# Supplementary material
Source: PubMed Central journal article supplement (PMC4428032)
Supplement: bc5b00028_si_001.pdf [file bc5b00028_si_001.pdf]

## Supporting information

### Molecular Platform for Design and Synthesis of Targeted Dual-modality Imaging Probes

*Amit Kumar, Shanrong Zhang, Guiyang Hao, Koji Sagiyama, Gedaa Hassan, Saleh Ramezani, Su-Tang Lo, Masaya Takahashi, A. Dean Sherry, Orhan, K. Öz, Zoltan Kovacs, Xiankai Sun\**

#### Table of Contents

|                                                                         |   |
|-------------------------------------------------------------------------|---|
| Synthesis Procedures.....                                               | 2 |
| Determining the Gd to Ga ration in Gd <sub>6</sub> LGa by ICP mass..... | 3 |
| Integrin Receptor Binding Assay .....                                   | 3 |
| References .....                                                        | 4 |

## Synthesis Procedures

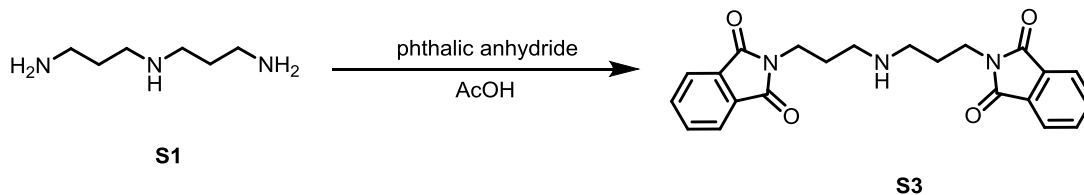

**Compound S3.** Bis(phthalimidylpropyl)amine (**S3**) was synthesized following a previously published report.<sup>1</sup> Briefly, phthalic anhydride (**S2**) (5.0 g, 33.8 mmol) was added to a solution of bis(3-aminopropyl)amine (**S1**) (2.03 g, 15.5 mmol) in toluene/DMF (50 mL/5 mL). The reaction mixture was stirred under reflux for 24 hours. The solvent was then evaporated and EtOH was (100 mL) added to the residue. The resultant mixture was stirred for 5 hours, the precipitate filtered, and dried to give compound **S3** (yield: 75%). <sup>1</sup>H NMR (400 MHz, CDCl<sub>3</sub>): δ = 7.83 (m, 4H), 7.70 (m, 4H), 3.75 (t, *J* = 6.8 Hz, 4H), 2.62 (t, *J* = 6.8 Hz, 4H), 1.84 (quintet, *J* = 6.8 Hz, 4H).

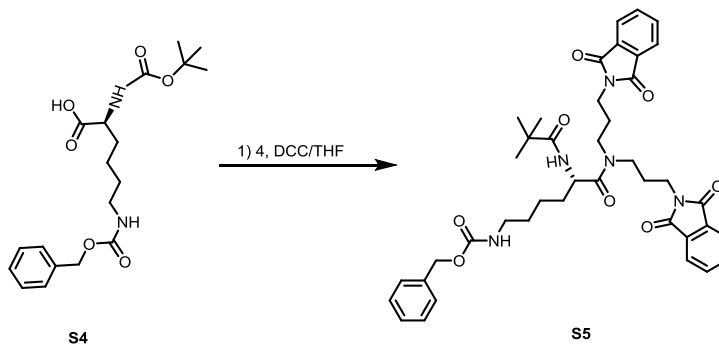

**Compound S5.** To a solution of protected lysine **S4** (2.0 g, 5.3 mmol) in THF (10 mL), were added the phthalimide protected secondary amine **S3** (2.1 g, 5.3 mmol), dicyclohexylcarbodiimide (1.1 g, 5.5 mmol) and triethylamine (0.6 g, 5.5 mmol). The resultant solution was stirred for 24 hours, filtered and the solvent evaporated. The crude product was purified by flash chromatography (ethyl acetate/hexane 1:1) to give lysine derivative **S5** (2.3 g, 3.0 mmol, 57%) as a white solid. <sup>1</sup>H NMR (400 MHz, CDCl<sub>3</sub>): δ = 7.65 (m, 3H), 7.54 (m, 3H), 7.18 (m, 4H), 5.47 (m, 1H), 5.27 (m, 1H), 4.94 (m, 1H), 4.36 (m, 1H), 3.72-3.34 (m, 6H), 3.23-2.89 (m, 4H), 2.03-1.63 (m, 5H), 1.62-1.35 (m, 4H), 1.33-1.11 (m, 10H). <sup>13</sup>C NMR (100 MHz, CDCl<sub>3</sub>): δ 172.5, 168.3, 168.1, 156.4, 155.4, 136.7, 133.8, 131.9, 128.3, 127.9, 127.8, 123.2, 123.1, 79.3, 66.2, 49.6, 45.6, 43.9, 40.6, 35.6, 35.3, 33.1, 30.1, 30.5, 29.5, 29.1, 28.6, 28.2, 26.9, 22.4. MS (MALDI) *m/z* calcd for C<sub>41</sub>H<sub>47</sub>N<sub>5</sub>O<sub>9</sub>: 753.3; found: 776.6 ([M + Na]<sup>+</sup>).

**Compound 2.** To a solution of a lysine derivative **S5** (2.3 g, 3.0 mmol,) was added TFA (10 mL) and the solution was allowed to stir for 12 h. The solvent evaporated and the crude product was purified by flash chromatography (ethyl acetate) to give **2** as a white solid (1.8 g, 2.8 mmol, 93%). <sup>1</sup>H NMR (400 MHz, CDCl<sub>3</sub>): δ = 7.73 (m, 3H), 7.61 (m, 3H), 7.23 (m, 4H), 5.87 (m, 1H), 5.58 (m, 1H), 4.97 (m, 1H), 4.40 (m, 1H), 3.72-3.37 (m, 6H), 3.35-2.82 (m, 4H), 2.10-1.68 (m,

5H), 1.59-1.29 (m, 4H). <sup>13</sup>C NMR (100 MHz, CDCl<sub>3</sub>): δ 169.1, 168.3, 156.8, 136.7, 134.1, 133.9, 131.8, 131.7, 128.4, 127.9, 123.3, 123.2, 66.4, 50.7, 45.5, 43.8, 40.1, 35.5, 35.1, 30.8, 29.7, 29.1, 27.7, 26.5, 21.4. MS (MALDI) m/z calcd for C<sub>36</sub>H<sub>39</sub>N<sub>5</sub>O<sub>7</sub>: 653.3; found: 654.6 ([M + H]<sup>+</sup>).

### Determining the Gd to Ga ration in Gd<sub>6</sub>LGa by ICP mass

Calibration curve was obtained by injecting various known concentrations of gallium and gadolinium salts in the ICP-mass. Various known concentrations of gallium and gadolinium salts were obtained by dissolving their chlorides in a 2.5 % HCl solution. All dilutions were performed in 2.5 % HCl solution. The solutions used for T<sub>1</sub> mapping (a1-c1) were then injected to the ICP-mass to get the concentration of the two salts. Replicates of each concentration were performed.

| Samples | Gadolinium (mM) | Gallium (mM) | Ratio Gd:Ga |
|---------|-----------------|--------------|-------------|
| a-1     | 0.728471        | 0.121136     | 6.013634    |
| a-2     | 0.734226        | 0.12062      | 6.087089    |
| b-1     | 0.368362        | 0.062548     | 5.889323    |
| b-2     | 0.37752         | 0.062892     | 6.002695    |
| c-1     | 0.170531        | 0.028871     | 5.906574    |
| c-2     | 0.188992        | 0.030865     | 6.123184    |

### Integrin $\alpha_v\beta_3$ Receptor-Binding Assay for Gd<sub>6</sub>H<sub>3</sub>L[c(RGDyK)]<sub>3</sub> and Gd<sub>6</sub>H<sub>3</sub>L[PEG<sub>12</sub>c(RGDyK)]<sub>3</sub>

The  $\alpha_v\beta_3$  integrin-binding affinities of c(RGDyK), Gd<sub>6</sub>H<sub>3</sub>L[c(RGDyK)]<sub>3</sub> and Gd<sub>6</sub>H<sub>3</sub>L[PEG<sub>12</sub>c(RGDyK)]<sub>3</sub> were determined by a competitive cell-binding assay using <sup>125</sup>I-echistatin (PerkinElmer) as the  $\alpha_v\beta_3$ -specific radioligand. The experiments were performed on U87MG human glioblastoma cells following a previously reported method.<sup>2</sup> Briefly, U87MG cells were grown in RPMI 1640 medium supplemented with penicillin, streptomycin, and 10% (v/v) fetal bovine serum (FBS) at 37 °C under 5% CO<sub>2</sub>. Suspended U87MG cells in binding buffer (20 mM Tris, pH 7.4, 150 mM NaCl, 2 mM CaCl<sub>2</sub>, 1 mM MgCl<sub>2</sub>, 1 mM MnCl<sub>2</sub>, 0.1% bovine serum albumin) were seeded on multiwell DV plates (Millipore) with 5 × 10<sup>4</sup> cells per well and then incubated with <sup>125</sup>I-echistatin (10 000 cpm/well) in the presence of increasing concentrations (0–5000 nM) of c(RGDyK) peptide conjugates for 2 h. The final volume in each well was maintained at 200 μL. At the end of incubation, unbound <sup>125</sup>I-echistatin was removed by filtration followed by three rinses with cold binding buffer. The retentate was collected and the radioactivity was measured using a  $\gamma$ -counter. The best-fit IC<sub>50</sub> values (inhibitory concentration where 50% of the <sup>125</sup>I-echistatin bound on U87MG cells are displaced) of c(RGDyK), Gd<sub>6</sub>H<sub>3</sub>L[c(RGDyK)]<sub>3</sub> and Gd<sub>6</sub>H<sub>3</sub>L[PEG<sub>12</sub>c(RGDyK)]<sub>3</sub> were calculated by fitting the data with nonlinear regression using GraphPad Prism (GraphPadSoftware, Inc.). Experiments were repeated with quintuplicate samples.

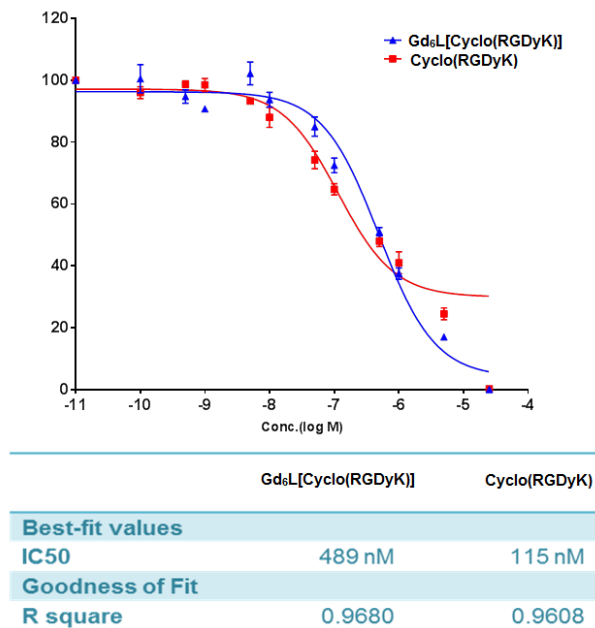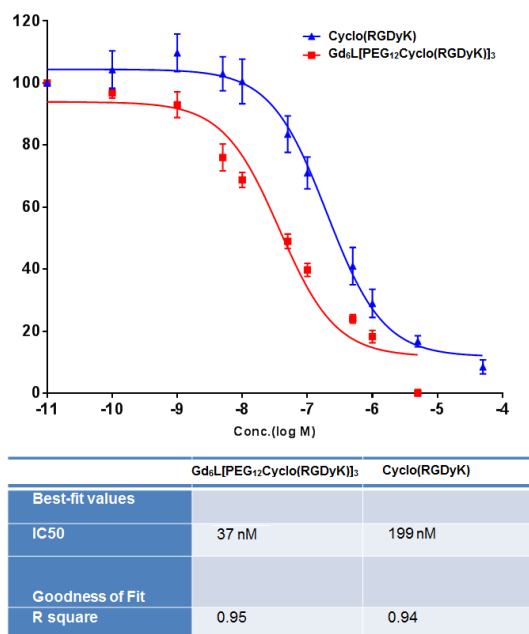

**Figure S1.** The calculated IC<sub>50</sub> values of synthesized probes a) Gd<sub>6</sub>H<sub>3</sub>L[c(RGDyK)]<sub>3</sub> and b) Gd<sub>6</sub>H<sub>3</sub>L[PEG<sub>12</sub>c(RGDyK)]<sub>3</sub>

## References

- (1) Kang, S. O.; Day, V. W.; Bowman-James, K. *Organic Letters* 2009, 11, 3654.

- (2) Liu, W.; Hao, G.; Long, M. A.; Anthony, T.; Hsieh, J.-T.; Sun, X. *Angewandte Chemie International Edition* 2009, 48, 7346.
